# Supplementary material for: Analysis of three genomes within the thermophilic bacterial species Caldanaerobacter subterraneus with a focus on carbon monoxide dehydrogenase evolution and hydrolase diversity
Source: PubMed Central journal article supplement (PMC4596419; doi:10.1186/s12864-015-1955-9), 2015-10-07

**MbxA**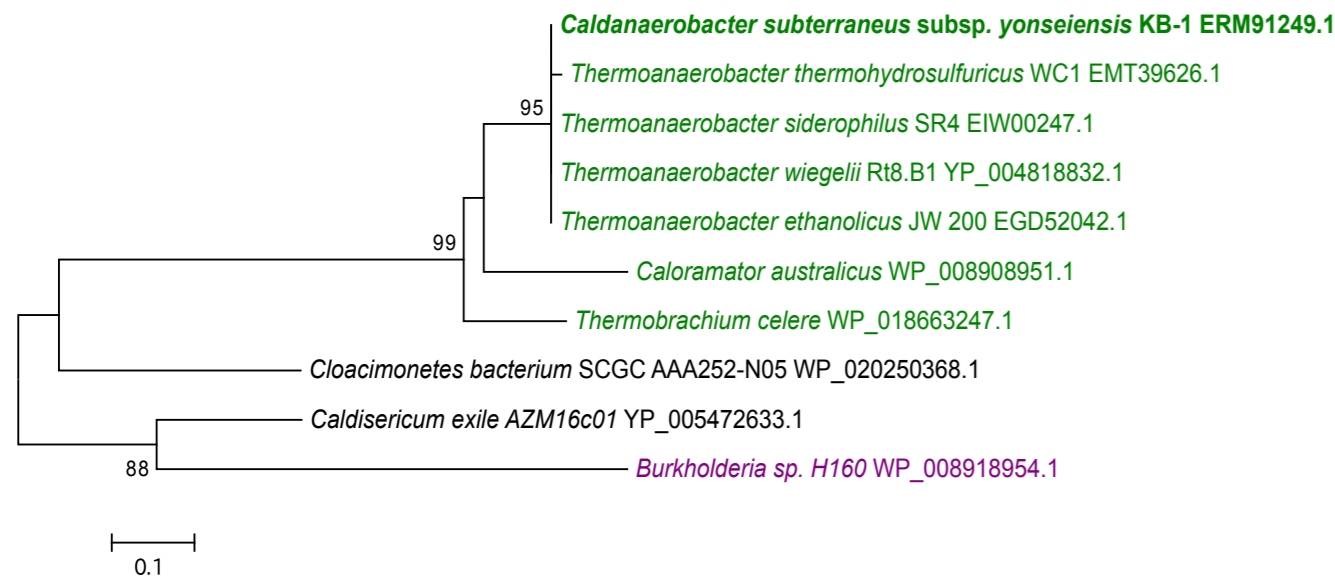**MbxG**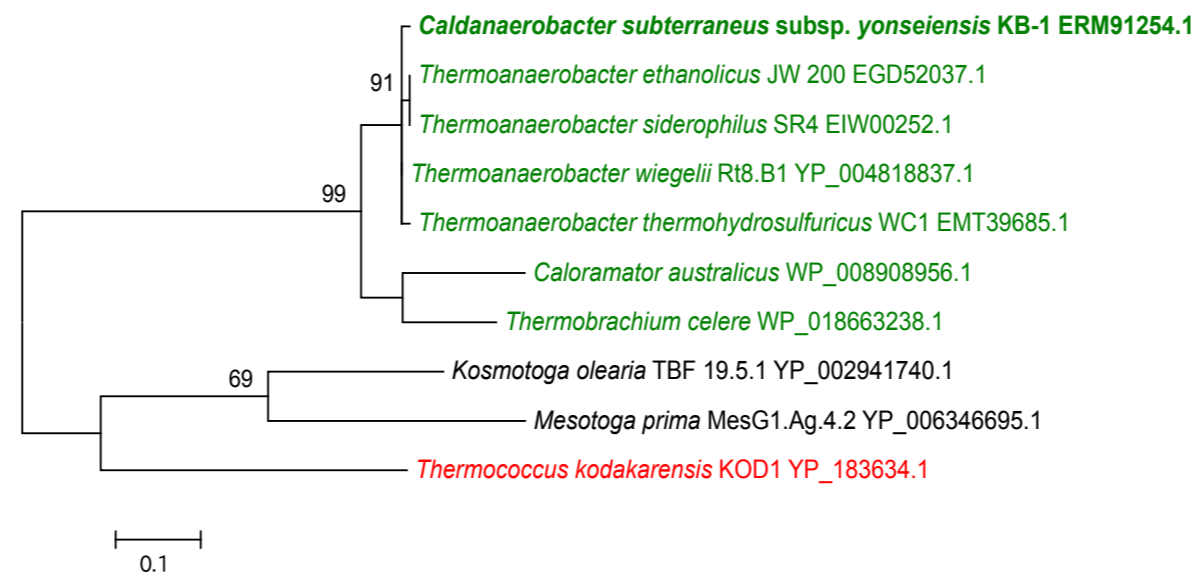**MbxL**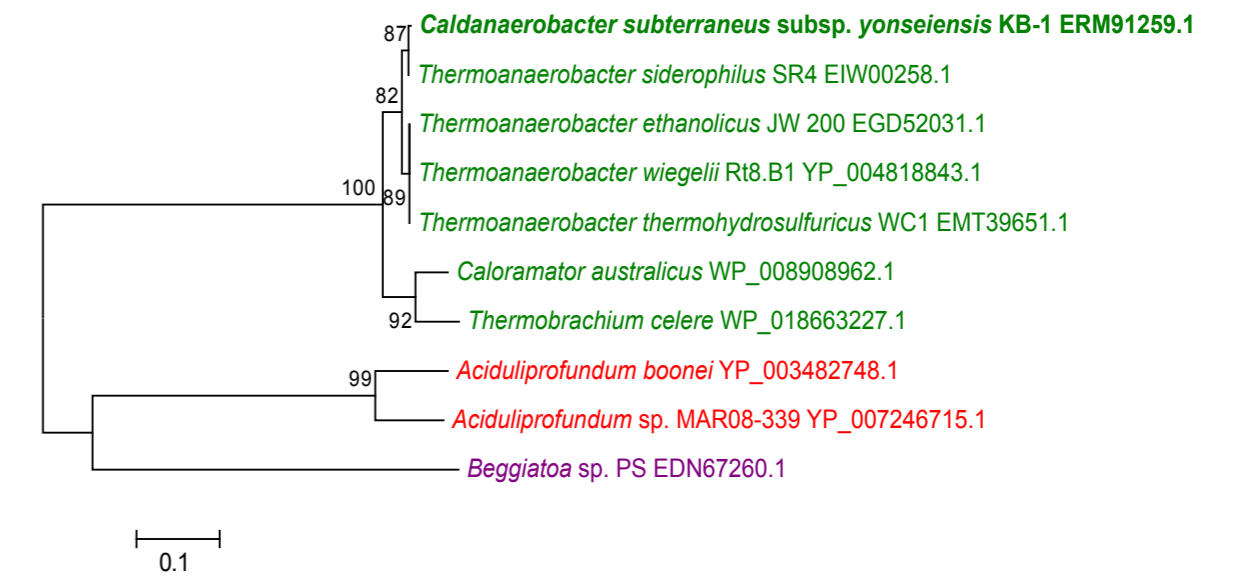**MbxB**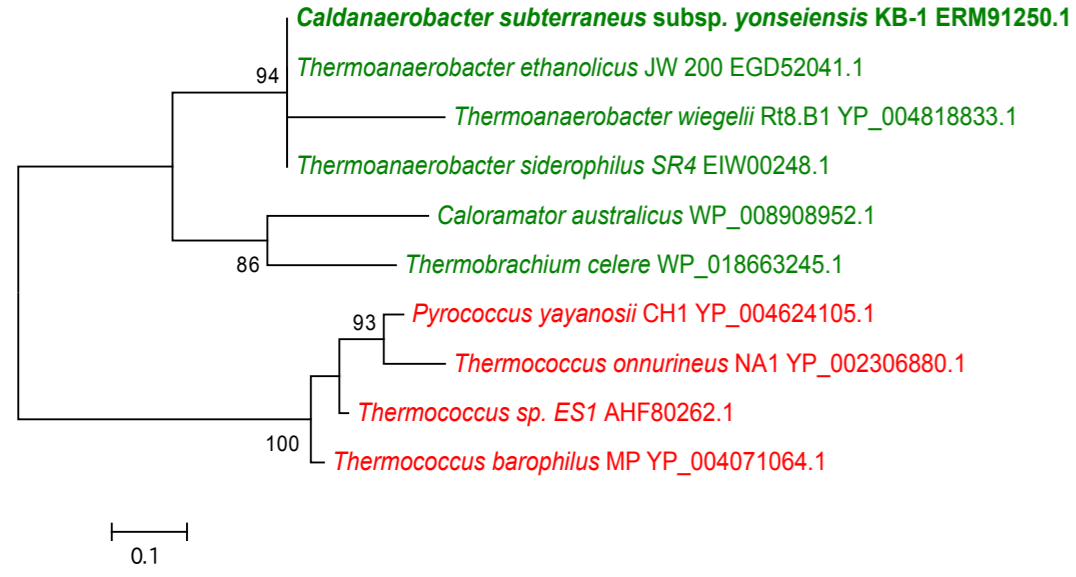**MbxH**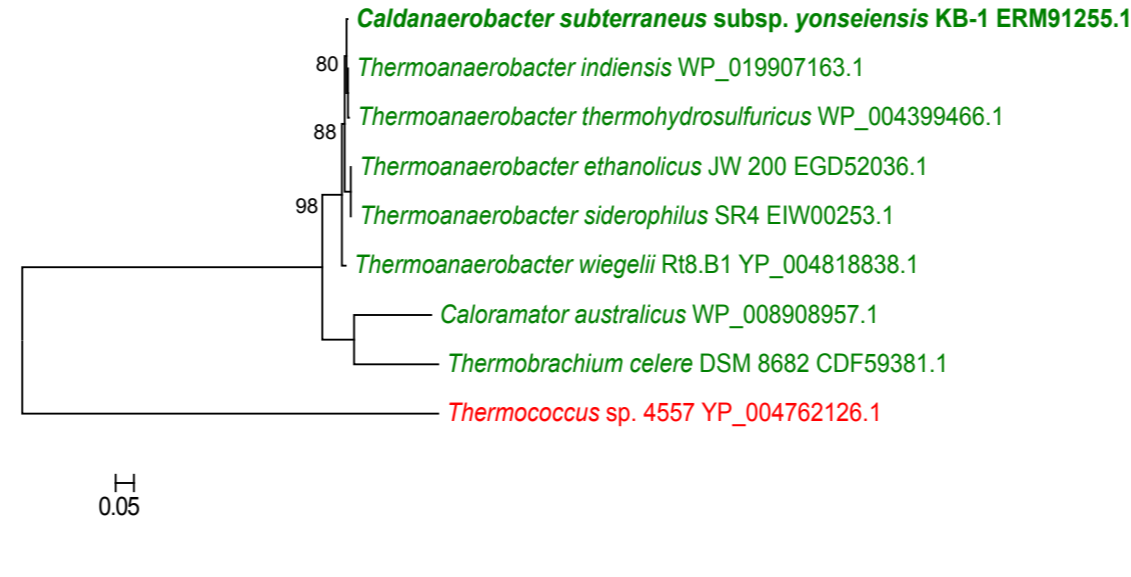**MbxM**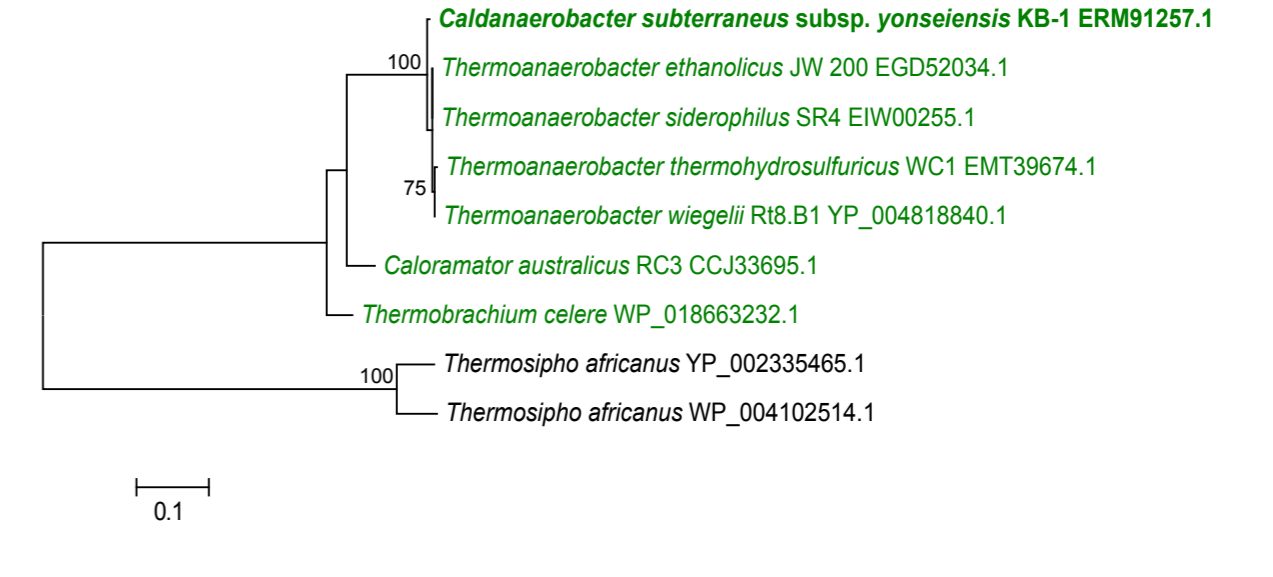**MbxC**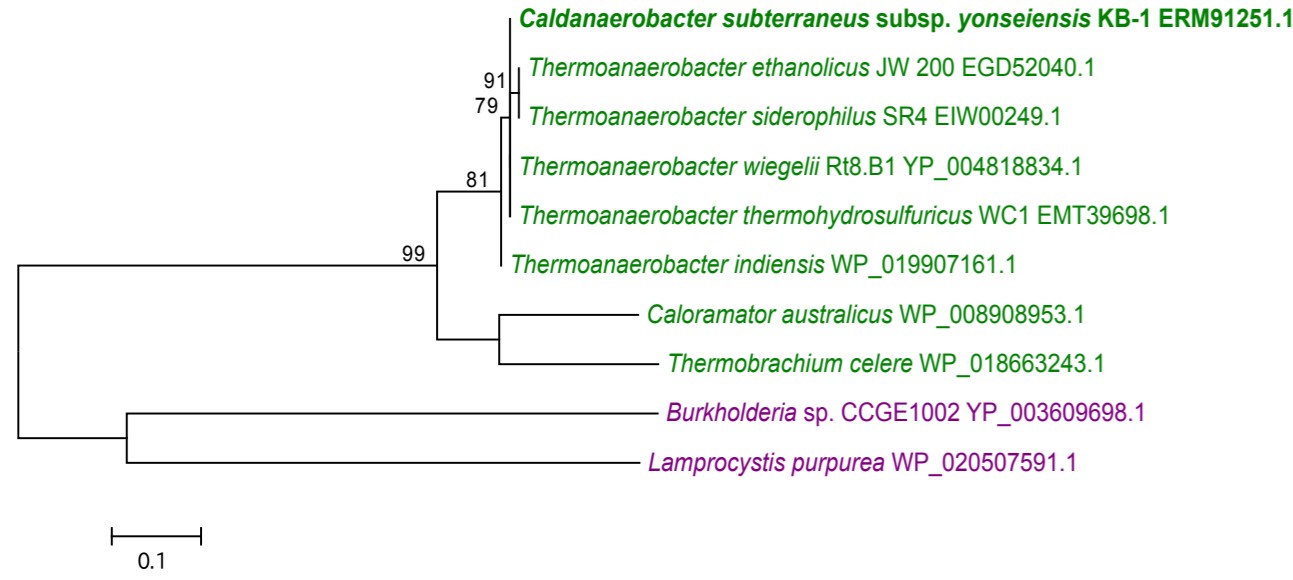**MbxH'**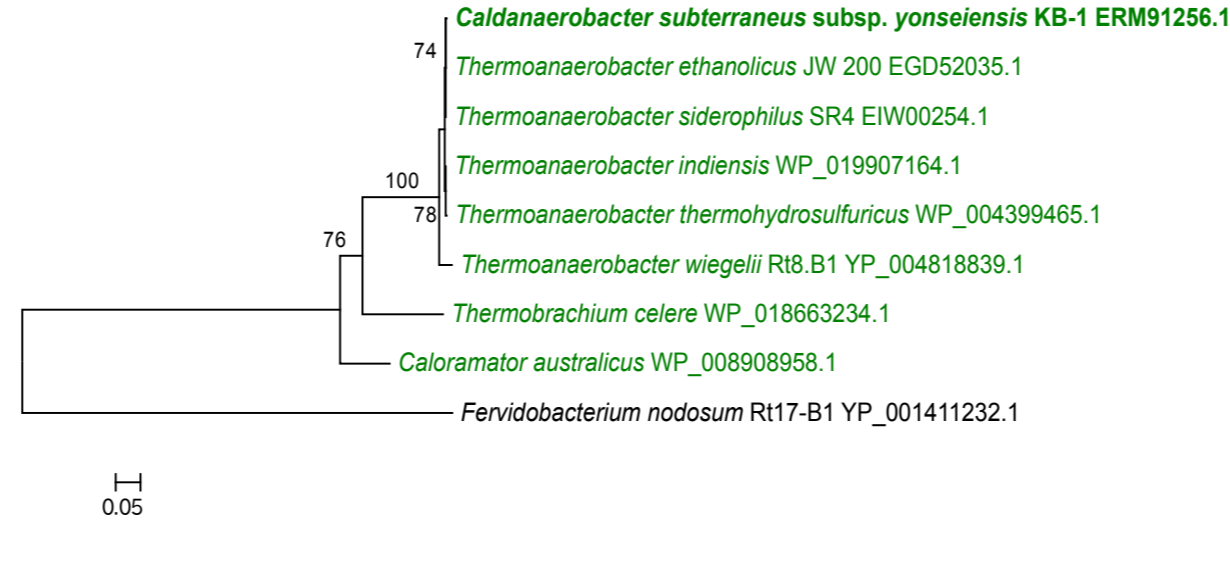**MbxN**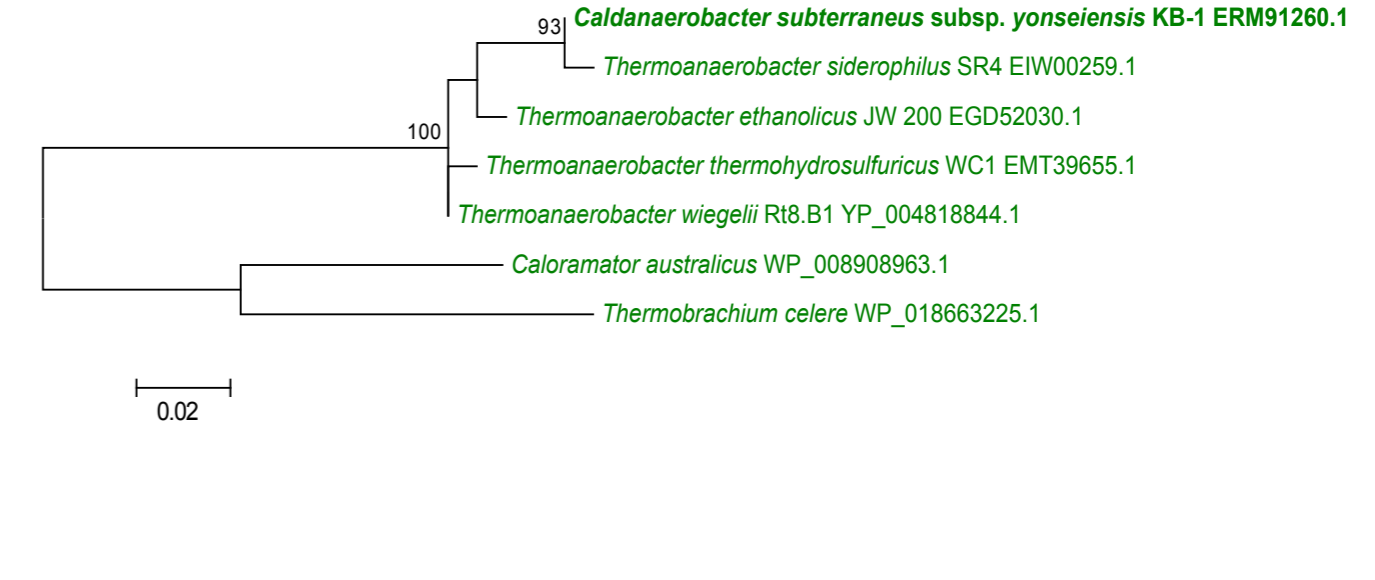**MbxD**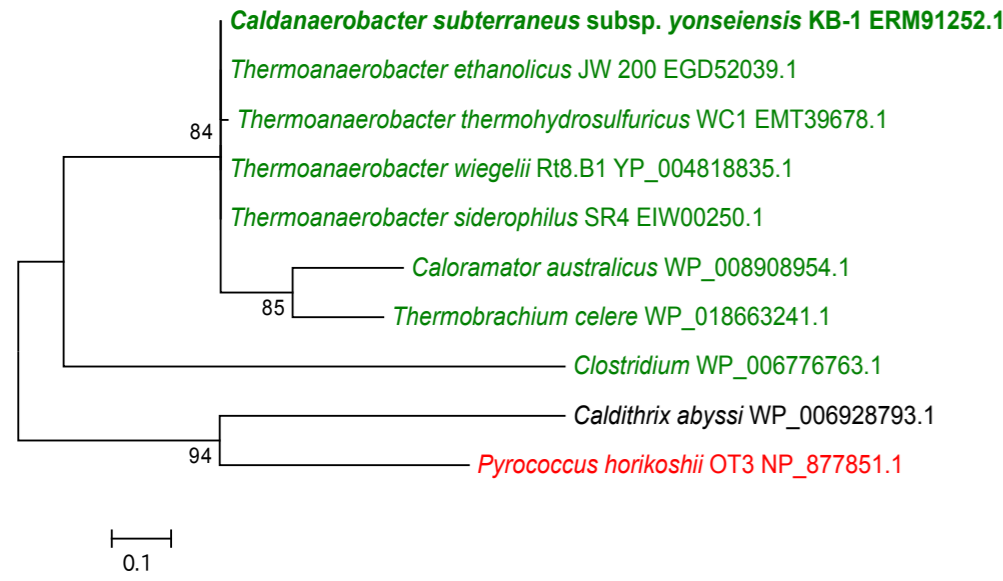**MbxJ**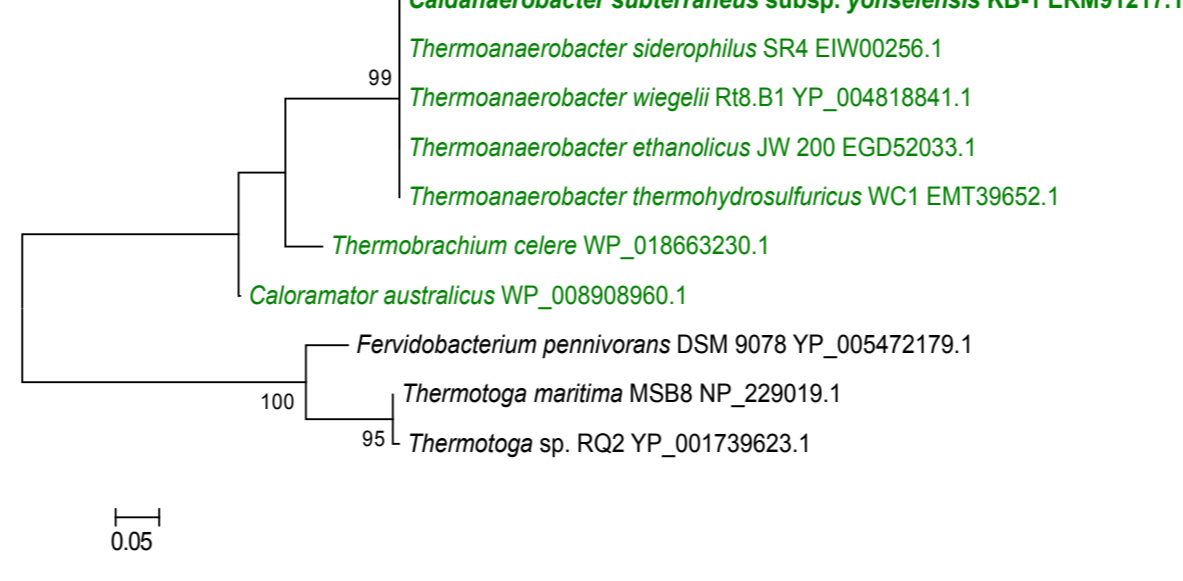**O163\_11495**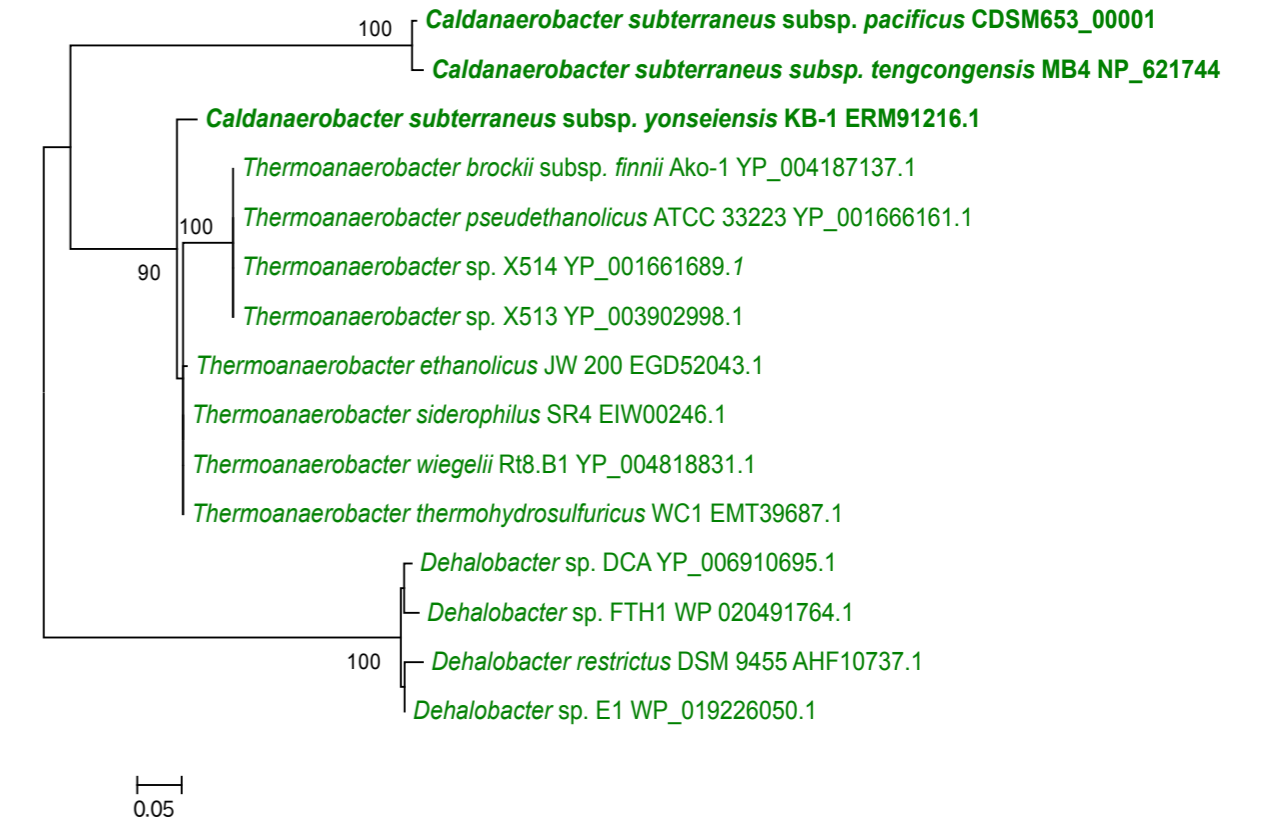**MbxF**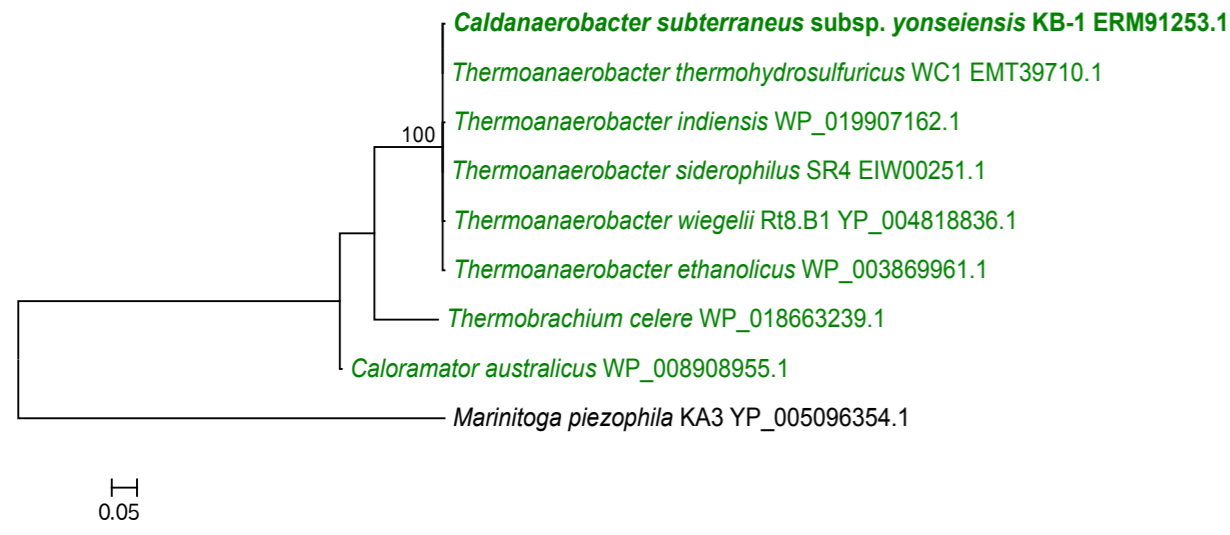**MbxK**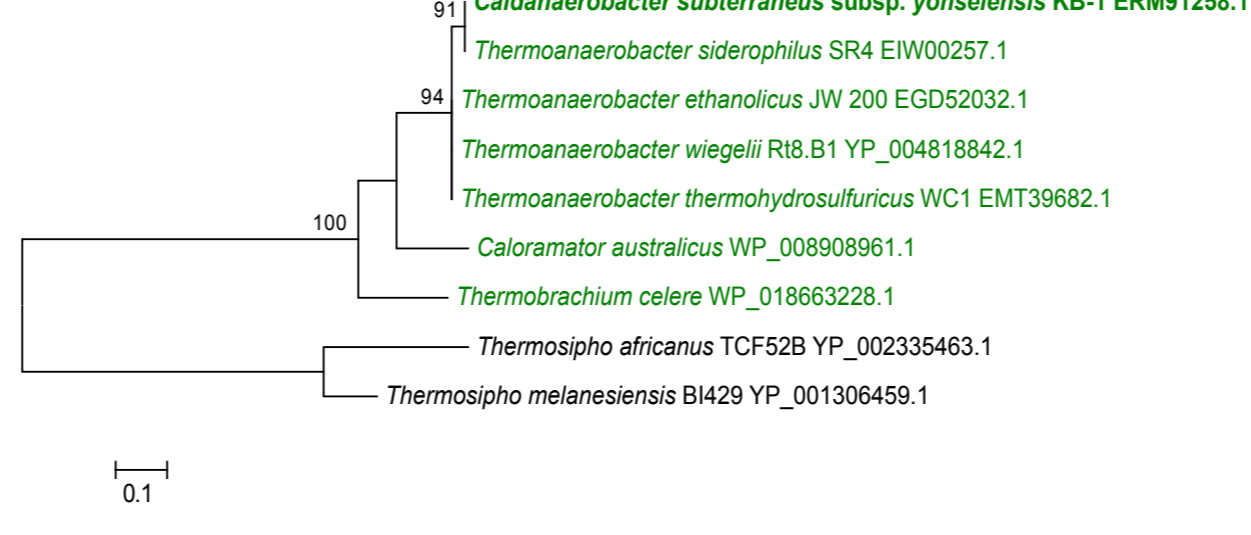**O163\_11565**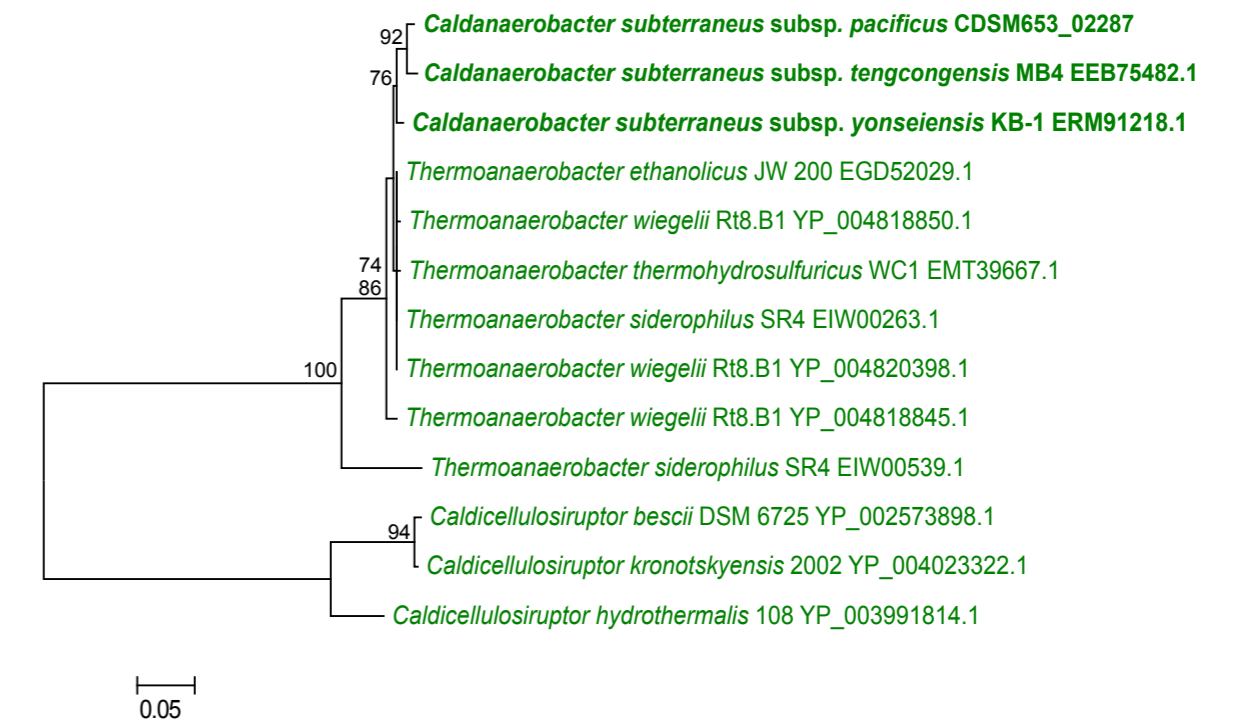

Supplement: 12864_2015_1955_MOESM9_ESM.pdf [file 12864_2015_1955_MOESM9_ESM.pdf]
