# Supplementary material for: Analysis of three genomes within the thermophilic bacterial species Caldanaerobacter subterraneus with a focus on carbon monoxide dehydrogenase evolution and hydrolase diversity
Source: PubMed Central journal article supplement (PMC4596419; doi:10.1186/s12864-015-1955-9), 2015-10-07
Supplement: 12864_2015_1955_MOESM3_ESM.pdf [file 12864_2015_1955_MOESM3_ESM.pdf]

## CooC

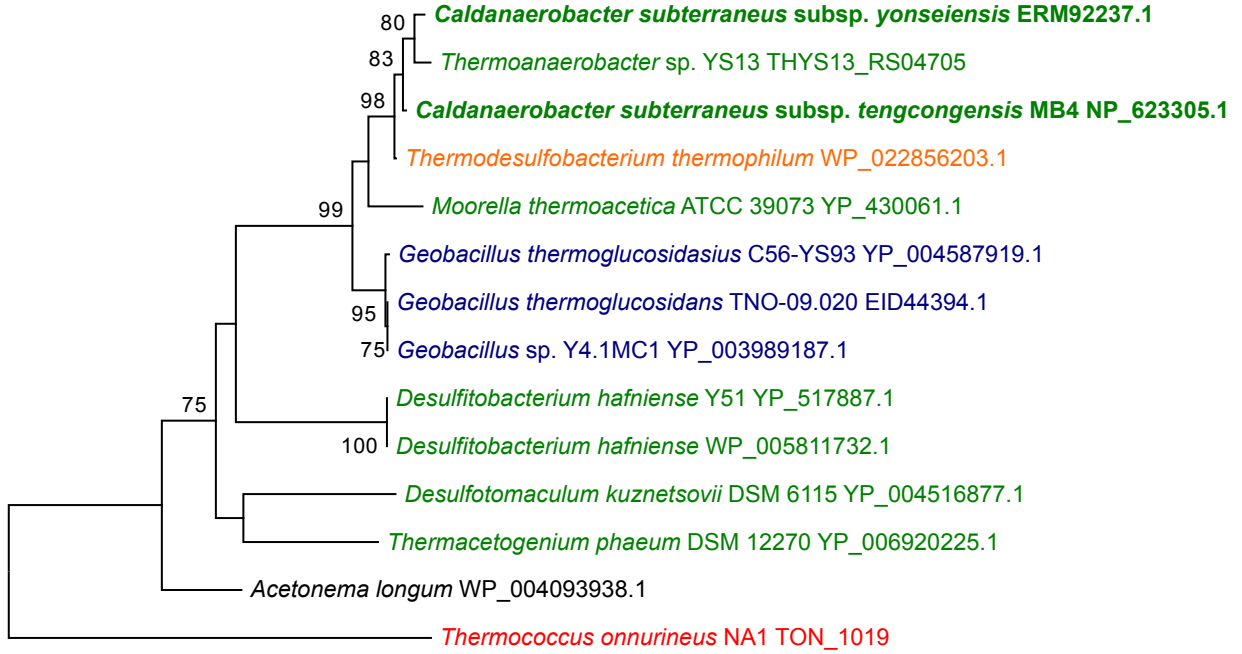

0.1

## CooF

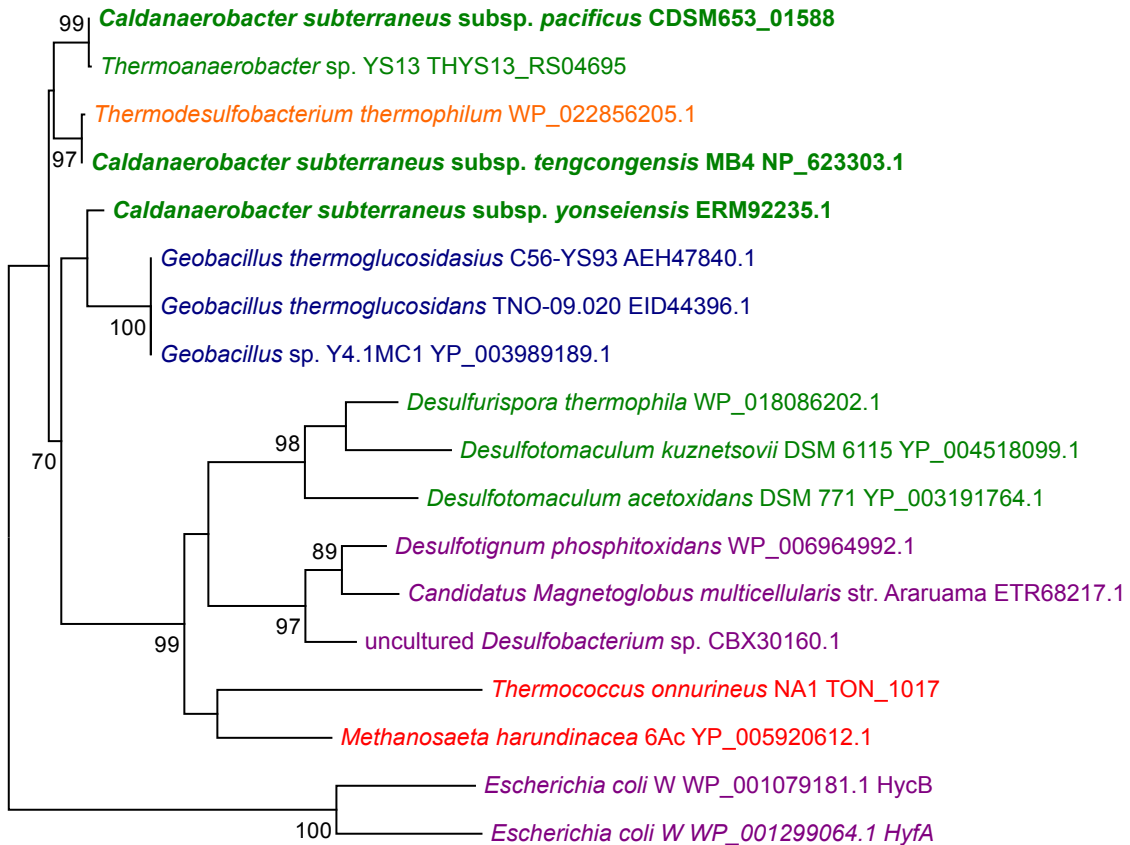

0.2
